# Supplementary material for: Reliability of Total Serum IgE Levels to Define Type 2 High and Low Asthma Phenotypes
Source: MDPI journal article supplement (doi:10.3390/jcm12175447), 2023-08-22
Supplement: s1 [file s1]

**Supplementary Table S1:** Descriptive statistics of clinical, bio-humoral and functional parameters among patients stratified by single biomarker cut-offs

| Characteristic                 | <i>IgE</i> ≥100KU/L<br>(N=278) | <i>IgE</i> <100KU/L<br>(N=269) | <i>FENO</i> ≥30ppb<br>(N=232) | <i>FENO</i> <30ppb<br>(N=266) | <i>B-EOS</i> ≥300cells/μL<br>(N=227) | <i>B-EOS</i> <300cells/μL<br>(N=314) |
|--------------------------------|--------------------------------|--------------------------------|-------------------------------|-------------------------------|--------------------------------------|--------------------------------------|
| <b>Age (years)</b>             | 56±16                          | 61±14***                       | 57±15                         | 60±15*                        | 59±15                                | 59±16                                |
| <b>Gender (Male)</b>           | 124 (44.6%)                    | 80 (29.7%)*                    | 92 (39.7%)                    | 99 (37.2%)                    | 89 (39.2%)                           | 114 (36.3%)                          |
| <b>BMI</b>                     | 26.4±5.6                       | 28.0±5.5***                    | 26.1±5.5                      | 27.9±5.7***                   | 26.9±5.8                             | 27.4±5.5                             |
| <b>Age at asthma onset</b>     | 33±19                          | 37±20*                         | 34±19                         | 35±20                         | 36±18                                | 34±21                                |
| <b>Early onset</b>             | 73 (26.3%)                     | 56 (20.8%)                     | 50 (21.6%)                    | 66 (24.8%)                    | 40 (17.6%)                           | 87 (27.7%)*                          |
| <b>Asthma duration (years)</b> | 23±15                          | 24±17                          | 23±16                         | 24±16                         | 22±16                                | 25±17                                |
| <b>Vitamin D (ng/mL)</b>       | 27.2±14.9                      | 26.5±11.9                      | 26.2±9.9                      | 27.6±16.0                     | 26.0±10.4                            | 27.5±15.4                            |
| <b>AE/y</b>                    | 1.40±2.37                      | 0.83±1.50***                   | 1.33±2.35                     | 0.89±1.56*                    | 1.26±1.29                            | 1.02±1.77                            |
| <b>FE phenotype</b>            | 69 (27.7%)                     | 49 (19.8%)*                    | 57 (26.6%)                    | 49 (20.4%)                    | 53 (24.9%)                           | 65 (23.1%)                           |
| <b>Serious AE</b>              | 93 (36.2%)                     | 82 (32.0%)                     | 79 (35.6%)                    | 82 (50.9%)                    | 76 (35.7%)                           | 99 (33.6%)                           |
| <b>Fibrinogen (mg/dL)</b>      | 340.0±81.9                     | 343.0±83.2                     | 340.1±81.5                    | 344.6±82.8                    | 347.1±84.0                           | 336.6±81.2                           |
| <b>Current smokers (≥10PY)</b> | 12 (4.3%)                      | 18 (6.7%)                      | 11 (4.7%)                     | 18 (6.8%)                     | 12 (5.3%)                            | 18 (5.7%)                            |
| <b>Past smokers (≥10PY)</b>    | 66 (23.7%)                     | 59 (21.9%)                     | 43 (18.5%)                    | 70 (26.3%)*                   | 50 (22.0%)                           | 75 (23.9%)                           |
| <b>Leukocytes (cells/μL)</b>   | 7476±2339                      | 7102±1914*                     | 7340±2252                     | 7213±2045                     | 7779±2259                            | 6944±1999***                         |
| <b>Lymphocytes (cells/μL)</b>  | 2374±855                       | 2261±723                       | 2350±781                      | 2315±808                      | 2483±889                             | 2200±697***                          |
| <b>Monocytes (cells/μL)</b>    | 594±231                        | 553±192*                       | 576±199                       | 560±191                       | 629±234                              | 538±189***                           |
| <b>Neutrophils (cells/μL)</b>  | 4133±1581                      | 3941±1479                      | 3968±1458                     | 4043±1533                     | 4068±1474                            | 4016±1578                            |
| <b>Basophils (cells/μL)</b>    | 44±43                          | 49±33                          | 46±34                         | 49±42                         | 56±45                                | 40±31***                             |
| <b>Eosinophils (cells/μL)</b>  | 414±569                        | 272±264***                     | 456±622                       | 253±213***                    | -                                    | -                                    |

|                                |             |                 |             |               |             |                |
|--------------------------------|-------------|-----------------|-------------|---------------|-------------|----------------|
| <b>FeNO (ppb)</b>              | 41.8±39.2   | 34.4±30.3*      | -           | -             | 48.1±39.1   | 31.1±30.3****  |
| <b>Total serum IgE (kU/L)</b>  | -           | -               | 344.6±709.3 | 207.2±324.4** | 364.9±700.1 | 203.6±369.3*** |
| <b>Allergic sensitization</b>  | 190 (63.8%) | 108 (40.1%)**** | 144 (62.1%) | 132 (49.6%)** | 125 (55.1%) | 170 (54.1%)    |
| <b>FVC(%pred.)</b>             | 99.2±18.7   | 101.1±19.6      | 100.7±19.8  | 100.1±18.3    | 99.6±18.6   | 100.3±19.5     |
| <b>FEV<sub>1</sub>(%pred.)</b> | 82.8±21.9   | 85.5±20.8       | 84.4±21.6   | 84.0±20.9     | 82.7±20.5   | 84.6±21.8      |
| <b>FEV<sub>1</sub>/FVC (%)</b> | 67.9±14.3   | 68.8±10.1       | 68.7±13.5   | 68.0±11.7     | 67.4±13.8   | 68.8±11.2      |
| <b>RV (%pred.)</b>             | 130.4±41.9  | 124.4±32.0      | 128.3±39.8  | 126.4±35.1    | 128.1±38.5  | 127.5±35.6     |
| <b>ACT</b>                     | 20.1±4.4    | 20.2±4.2        | 20.3±4.1    | 20.3±4.2      | 20.4±4.1    | 19.9±4.4       |
| <b>BCM HFA dose (µg)</b>       | 383.7±272.2 | 343.8±244.2     | 382.2±263.9 | 331.9±242.0*  | 394.7±261.2 | 345.2±254.9**  |
| <b>Chronic OCS use</b>         | 24 (8.6%)   | 13 (4.8%)       | 15 (6.5%)   | 16 (6.0%)     | 17 (7.5%)   | 20 (6.4%)      |
| <b>LABA use</b>                | 229 (82.4%) | 218 (81.0%)     | 187 (80.6%) | 216 (81.2%)   | 195 (85.9%) | 249 (79.3%)    |
| <b>LAMA use</b>                | 44 (15.8%)  | 50 (18.6%)      | 34 (14.7%)  | 52 (19.5%)    | 36 (15.9%)  | 58 (18.5%)     |
| <b>Biologics ongoing</b>       | 30 (10.8%)  | 9 (3.3%)        | 20 (8.6%)   | 17 (6.4%)     | 23 (10.1%)  | 16 (5.1%)      |
| <b>Pre Biologics</b>           | 32 (11.5%)  | 16 (5.9%)       | 29 (12.5%)  | 16 (6.0%)     | 36 (15.9%)  | 12 (3.8%)      |

The results are expressed as mean with standard deviation or as a number of subjects with percentage. \*= $p<0.05$ ; \*\*= $p<0.01$ ; \*\*\*= $p<0.001$ ; \*\*\*\*= $p<0.0001$ .

**Supplementary Table S2:** Binomial LRM of variables for asthmatic patients stratified according to serum Total IgE and T2 inflammatory phenotype

| Characteristic       | <i>T2<sub>Low</sub>-IgE<sub>Low</sub></i> |       |         | <i>T2<sub>Low</sub>-IgE<sub>High</sub></i> |       |        | <i>T2<sub>High</sub>-IgE<sub>Low</sub></i> |       |       | <i>T2<sub>High</sub>-IgE<sub>High</sub></i> |       |       |
|----------------------|-------------------------------------------|-------|---------|--------------------------------------------|-------|--------|--------------------------------------------|-------|-------|---------------------------------------------|-------|-------|
|                      | OR                                        | LB    | UB      | OR                                         | LB    | UB     | OR                                         | LB    | UB    | OR                                          | LB    | UB    |
| Age                  | 0.990                                     | 0.932 | 1.051   | 0.948                                      | 0.857 | 1.049  | 1.007                                      | 0.975 | 1.039 | 1.005                                       | 0.974 | 1.036 |
| BMI                  | <b>1.222*</b>                             | 1.047 | 1.427   | 0.987                                      | 0.798 | 1.222  | 1.008                                      | 0.930 | 1.092 | 0.920                                       | 0.843 | 1.004 |
| Age at asthma onset  | 1.036                                     | 0.991 | 1.083   | 1.037                                      | 0.961 | 1.119  | 1.004                                      | 0.978 | 1.030 | <b>0.975*</b>                               | 0.950 | 1.000 |
| FE phenotype         | 0.515                                     | 0.046 | 5.724   | 3.287                                      | 0.203 | 53.112 | 2.304                                      | 0.688 | 7.715 | 0.805                                       | 0.254 | 2.546 |
| AE/years             | 0.922                                     | 0.501 | 1.698   | 1.248                                      | 0.714 | 2.181  | 0.738                                      | 0.524 | 1.038 | 1.148                                       | 0.873 | 1.510 |
| FVC (L)              | 0.118                                     | 0.012 | 1.163   | 1.740                                      | 0.090 | 33.791 | 1.249                                      | 0.433 | 3.605 | 1.702                                       | 0.610 | 4.747 |
| FEV <sub>1</sub> (L) | <b>19.528*</b>                            | 1.165 | 327.304 | 0.255                                      | 0.006 | 11.441 | 0.922                                      | 0.238 | 3.570 | 0.463                                       | 0.124 | 1.729 |
| FRC (%pred)          | <b>1.040*</b>                             | 1.007 | 1.075   | 1.018                                      | 0.980 | 1.057  | <b>0.978*</b>                              | 0.962 | 0.994 | 1.010                                       | 0.994 | 1.026 |
| Activity limitation  | 0.789                                     | 0.391 | 1.592   | 0.432                                      | 0.140 | 1.333  | 0.874                                      | 0.580 | 1.318 | 1.333                                       | 0.893 | 1.989 |
| Gender (male)        | 0.900                                     | 0.121 | 6.702   | 4.339                                      | 0.318 | 59.183 | 0.591                                      | 0.230 | 1.520 | 1.333                                       | 0.531 | 3.344 |
| Early onset          | 2.854                                     | 0.298 | 27.328  | 0.729                                      | 0.025 | 21.687 | 0.696                                      | 0.238 | 2.029 | 1.523                                       | 0.522 | 4.443 |
| Past smokers (≥10PY) | 0.226                                     | 0.043 | 1.185   | 3.403                                      | 0.571 | 20.303 | 1.569                                      | 0.703 | 3.501 | 0.783                                       | 0.354 | 1.733 |
| Rhinitis             | 0.476                                     | 0.147 | 1.542   | 2.211                                      | 0.221 | 22.124 | 0.947                                      | 0.461 | 1.946 | 1.416                                       | 0.682 | 2.939 |
| CRSwNP               | 0.158                                     | 0.012 | 2.100   | 1.162                                      | 0.109 | 12.334 | 1.343                                      | 0.581 | 3.103 | 0.940                                       | 0.403 | 2.196 |



|                      |               |       |       |       |       |        |       |       |       |       |       |        |
|----------------------|---------------|-------|-------|-------|-------|--------|-------|-------|-------|-------|-------|--------|
| <b>GINA (step 1)</b> | 0.000         | 0.000 | -     | 0.426 | 0.014 | 12.965 | 0.670 | 0.164 | 2.740 | 3.783 | 0.917 | 15.598 |
| <b>GINA (step 2)</b> | 0.695         | 0.106 | 4.579 | 0.094 | 0.002 | 4.296  | 1.000 | 0.294 | 3.401 | 1.350 | 0.391 | 4.663  |
| <b>GINA (step 3)</b> | 1.175         | 0.140 | 9.840 | 0.034 | 0.000 | 2.871  | 0.590 | 0.149 | 2.341 | 1.770 | 0.451 | 6.950  |
| <b>GINA (step 4)</b> | <b>0.048*</b> | 0.004 | 0.637 | 0.087 | 0.002 | 4.728  | 1.522 | 0.375 | 6.169 | 2.235 | 0.544 | 9.188  |

\*=p<0.05, \*\*=p<0.01, \*\*\*=p<0.001. Bold font highlights statistically significant results. LB: lower bound, UB: upper bound; FVC: forced vital capacity; FEV<sub>1</sub>: forced expiratory capacity in the first second; FRC: Functional residual capacity; CRSwNP: Chronic Rhinosinusitis with nasal polyps; LAMA: long-acting muscarinic antagonist; GINA: Global Initiative for Asthma; Obesity= BMI≥30.

**Supplementary Table S3:** Multinomial LRM of variables comparing each group of patients stratified according to serum Total IgE and T2 inflammatory phenotype

| <b>Characteristic</b> | <i>T2<sub>Low</sub>-IgE<sub>Low</sub></i>       |       |       | <i>T2<sub>High</sub>-IgE<sub>High</sub></i>   |       |       | <i>T2<sub>Low</sub>-IgE<sub>Low</sub></i>      |       |       | <i>T2<sub>low</sub>-IgE<sub>high</sub></i>    |       |       | <i>T2<sub>low</sub>-IgE<sub>low</sub></i>      |       |       | <i>T2<sub>High</sub>-IgE<sub>low</sub></i>    |       |       |
|-----------------------|-------------------------------------------------|-------|-------|-----------------------------------------------|-------|-------|------------------------------------------------|-------|-------|-----------------------------------------------|-------|-------|------------------------------------------------|-------|-------|-----------------------------------------------|-------|-------|
|                       | <i>vs. T2<sub>High</sub>-IgE<sub>high</sub></i> |       |       | <i>vs. T2<sub>Low</sub>-IgE<sub>Low</sub></i> |       |       | <i>vs. T2<sub>low</sub>-IgE<sub>high</sub></i> |       |       | <i>vs. T2<sub>Low</sub>-IgE<sub>Low</sub></i> |       |       | <i>vs. T2<sub>High</sub>-IgE<sub>low</sub></i> |       |       | <i>vs. T2<sub>low</sub>-IgE<sub>low</sub></i> |       |       |
|                       | OR                                              | LB    | UB    | OR                                            | LB    | UB    | OR                                             | LB    | UB    | OR                                            | LB    | UB    | OR                                             | LB    | UB    | OR                                            | LB    | UB    |
| <b>Gender (male)</b>  | 0.274                                           | 0.072 | 1.046 | 3.651                                         | 0.956 | 13.94 | 0.150                                          | 0.021 | 1.057 | 6.676                                         | 0.946 | 47.09 | 0.464                                          | 0.120 | 1.792 | 2.155                                         | 0.558 | 8.321 |

|                            |              |       |       |              |       |       |              |       |       |              |       |       |              |       |       |       |       |       |
|----------------------------|--------------|-------|-------|--------------|-------|-------|--------------|-------|-------|--------------|-------|-------|--------------|-------|-------|-------|-------|-------|
| <b>BMI</b>                 | <b>1.153</b> | 1.016 | 1.309 | 0.867        | 0.764 | 0.984 | 1.120        | 0.903 | 1.388 | 0.893        | 0.720 | 1.107 | 1.086        | 0.963 | 1.225 | 0.921 | 0.817 | 1.039 |
|                            | *            |       |       | *            |       |       |              |       |       |              |       |       |              |       |       |       |       |       |
| <b>Age at asthma onset</b> | <b>1.044</b> | 1.015 | 1.074 | 0.958        | 0.931 | 0.985 | 1.023        | 0.977 | 1.072 | 0.977        | 0.933 | 1.023 | <b>1.035</b> | 1.006 | 1.065 | 0.966 | 0.939 | 0.994 |
|                            | **           |       |       | **           |       |       |              |       |       |              |       |       | *            |       |       | *     |       |       |
| <b>FE phenotype</b>        | 0.430        | 0.104 | 1.785 | 2.324        | 0.560 | 9.640 | <b>0.127</b> | 0.016 | 0.996 | <b>7.866</b> | 1.004 | 61.63 | 0.488        | 0.118 | 2.012 | 2.051 | 0.497 | 8.465 |
|                            |              |       |       |              |       |       | *            |       |       | *            |       | 5     |              |       |       |       |       |       |
| <b>Past smoker</b>         | 0.565        | 0.140 | 2.275 | 1.770        | 0.440 | 7.125 | 0.212        | 0.030 | 1.519 | 4.723        | 0.658 | 33.88 | 0.400        | 0.100 | 1.599 | 2.498 | 0.625 | 9.978 |
|                            |              |       |       |              |       |       |              |       |       |              |       | 3     |              |       |       |       |       |       |
| <b>Rhinitis</b>            | <b>0.317</b> | 0.106 | 0.948 | <b>3.151</b> | 1.055 | 9.410 | <b>0.117</b> | 0.017 | 0.821 | <b>8.529</b> | 1.218 | 59.72 | 0.349        | 0.117 | 1.038 | 2.866 | 0.963 | 8.530 |
|                            | *            |       |       | *            |       |       | *            |       |       | *            |       | 3     |              |       |       |       |       |       |
| <b>emphysema</b>           | <b>3.984</b> | 0.995 | 15.94 | <b>0.251</b> | 0.063 | 1.005 | 1.238        | 0.145 | 10.55 | 0.808        | 0.095 | 6.893 | 3.964        | 0.958 | 16.40 | 0.252 | 0.061 | 1.044 |
|                            | *            |       | 8     | *            |       |       |              |       | 6     |              |       |       |              |       | 8     |       |       |       |
| <b>OSAS</b>                | 0.601        | 0.020 | 18.30 | 1.665        | 0.055 | 50.76 | 0.131        | 0.003 | 5.796 | 7.634        | 0.173 | 337.8 | 0.501        | 0.022 | 11.54 | 1.996 | 0.087 | 46.01 |
|                            |              |       | 9     |              |       | 8     |              |       |       |              |       | 10    |              |       | 8     |       |       | 9     |
| <b>GERD</b>                | 0.735        | 0.228 | 2.368 | 1.360        | 0.422 | 4.379 | 0.510        | 0.081 | 3.217 | 1.962        | 0.311 | 12.38 | 0.757        | 0.240 | 2.390 | 1.321 | 0.418 | 4.169 |

|                       |       |       |       |       |       |       |       |                   |       |       |       |       |       |       |       |       |       |       |
|-----------------------|-------|-------|-------|-------|-------|-------|-------|-------------------|-------|-------|-------|-------|-------|-------|-------|-------|-------|-------|
| Obesity               | 0.409 | 0.084 | 1.986 | 2.445 | 0.504 | 11.86 | 0.216 | 0.020             | 2.342 | 4.629 | 0.427 | 50.19 | 0.516 | 0.114 | 2.330 | 1.938 | 0.429 | 8.755 |
|                       |       |       |       |       |       | 8     |       |                   |       |       |       | 4     |       |       |       |       |       |       |
| Arterial hypertension | 0.940 | 0.314 | 2.816 | 1.063 | 0.355 | 3.185 | 0.931 | 0.149             | 5.807 | 1.074 | 0.172 | 6.694 | 0.841 | 0.279 | 2.534 | 1.189 | 0.395 | 3.585 |
| Heart failure         | 7.988 | 1.062 | 6.010 | 1.252 | 1.252 | 2.891 | 0.1   | 5.78 <sup>E</sup> | 1.273 | 1.273 | 1.273 | 2.052 | 0.273 | 15.43 | 0.487 | 0.065 | 3.666 |       |
|                       | E8*** | E8    | E9    | E-9   | E-9   | E-9   | E8    | -8                | E-9   | E-9   | E-9   |       |       |       | 8     |       |       |       |
|                       |       |       |       | ***   |       |       |       |                   |       |       |       |       |       |       |       |       |       |       |
| Anxiety-depression    | 1.869 | 0.391 | 8.939 | 0.535 | 0.112 | 2.560 | 4.329 | 9.050             | 2.071 | 8.497 | 0.000 | -     | 0.497 | 0.119 | 2.080 | 2.011 | 0.481 | 8.411 |
|                       |       |       |       |       |       |       | E7*** | E7                | E8    | E-9   |       |       |       |       |       |       |       |       |
|                       |       |       |       |       |       |       |       |                   |       | ***   |       |       |       |       |       |       |       |       |
| Poor control          | 3.454 | 1.162 | 10.26 | 0.290 | 0.097 | 0.861 | 0.328 | 0.051             | 2.118 | 3.046 | 0.472 | 19.64 | 0.398 | 0.138 | 1.150 | 2.513 | 0.870 | 7.262 |
|                       | *     |       | 8     | *     |       |       |       |                   |       |       |       | 4     |       |       |       |       |       |       |
| FEV <sub>1</sub> (L)  | 1.567 | 0.588 | 4.176 | 0.638 | 0.239 | 1.701 | 1.696 | 0.322             | 8.928 | 0.590 | 0.112 | 3.105 | 1.401 | 0.524 | 3.747 | 0.714 | 0.267 | 1.909 |
| FRC (%pred)           | 1.008 | 0.984 | 1.032 | 0.992 | 0.969 | 1.016 | 1.001 | 0.964             | 1.039 | 0.999 | 0.962 | 1.037 | 1.028 | 1.004 | 1.054 | 0.972 | 0.949 | 0.996 |
|                       |       |       |       |       |       |       |       |                   |       |       |       |       | *     |       |       | *     |       |       |
| GINA                  | 0.605 | 0.357 | 1.023 | 1.654 | 0.977 | 2.799 | 0.762 | 0.325             | 1.787 | 1.313 | 0.560 | 3.078 | 0.623 | 0.368 | 1.054 | 1.606 | 0.949 | 2.716 |
| Chronic OCS use       | 0.813 | 0.134 | 4.937 | 1.229 | 0.203 | 7.461 | 0.398 | 0.023             | 6.766 | 2.514 | 0.148 | 42.76 | 1.569 | 0.226 | 10.90 | 0.637 | 0.092 | 4,42  |
|                       |       |       |       |       |       |       |       |                   |       |       |       | 0     |       |       | 5     |       |       | 8     |

|                  |       |       |       |       |       |       |       |       |       |       |       |       |       |       |       |       |       |       |       |
|------------------|-------|-------|-------|-------|-------|-------|-------|-------|-------|-------|-------|-------|-------|-------|-------|-------|-------|-------|-------|
| LAMA use         | 9.873 | 2.411 | 40.43 | 0.101 | 0,025 | 0.415 | 5.710 | 0.604 | 53.94 | 0.175 | 0.019 | 1.654 | 3.358 | 0.885 | 12.74 | 0.298 | 0.078 | 1.130 |       |
|                  | **    |       | 5     | **    |       |       |       |       | 9     |       |       |       |       |       | 1     |       |       |       |       |
| Nasal CS use     | 0.280 | 0.101 | 0.777 | 3.567 | 1.287 | 9.890 | 0.557 | 0.103 | 3.006 | 1.796 | 0.333 | 9.701 | 0.278 | 0.100 | 0.770 | 3.598 | 1.299 | 9.965 |       |
|                  | *     |       |       | *     |       |       |       |       |       |       |       |       | *     |       |       | *     |       |       |       |
| antileukotrienes | 1.853 | 0.328 | 10.45 | 0.540 | 0.096 | 3.045 | 1.786 | 0.1   | 3.57  | 2.060 | 0.000 | -     |       | 1.213 | 0.223 | 6.582 | 0.825 | 0.152 | 4.476 |
|                  |       |       | 7     |       |       |       | E7    |       | E-7   | E-8   |       |       |       |       |       |       |       |       |       |

|                            | <i>T2<sub>low</sub>-IgE<sub>high</sub></i>     |       |       | <i>T2<sub>High</sub>-IgE<sub>Low</sub></i>     |       |       | <i>T2<sub>low</sub>-IgE<sub>high</sub></i>      |       |       | <i>T2<sub>High</sub>-IgE<sub>High</sub></i>    |       |       | <i>T2<sub>High</sub>-IgE<sub>low</sub></i>      |       |       | <i>T2<sub>High</sub>-IgE<sub>High</sub></i>    |       |       |
|----------------------------|------------------------------------------------|-------|-------|------------------------------------------------|-------|-------|-------------------------------------------------|-------|-------|------------------------------------------------|-------|-------|-------------------------------------------------|-------|-------|------------------------------------------------|-------|-------|
| <b>Characteristic</b>      | <i>vs. T2<sub>High</sub>-IgE<sub>Low</sub></i> |       |       | <i>vs. T2<sub>low</sub>-IgE<sub>high</sub></i> |       |       | <i>vs. T2<sub>High</sub>-IgE<sub>High</sub></i> |       |       | <i>vs. T2<sub>Low</sub>-IgE<sub>High</sub></i> |       |       | <i>vs. T2<sub>High</sub>-IgE<sub>High</sub></i> |       |       | <i>vs. T2<sub>High</sub>-IgE<sub>low</sub></i> |       |       |
|                            | OR                                             | LB    | UB    | OR                                             | LB    | UB    | OR                                              | LB    | UB    | OR                                             | LB    | UB    | OR                                              | LB    | UB    | OR                                             | LB    | UB    |
| <b>Gender (male)</b>       | 3.098                                          | 0.568 | 16.89 | 0.323                                          | 0.059 | 1.761 | 1.829                                           | 0.350 | 9.541 | 0.547                                          | 0.105 | 2.853 | 0.590                                           | 0.265 | 1.314 | 1.694                                          | 0.761 | 3.773 |
|                            |                                                |       | 8     |                                                |       |       |                                                 |       |       |                                                |       |       |                                                 |       |       |                                                |       |       |
| <b>BMI</b>                 | 0.970                                          | 0.799 | 1.177 | 1.031                                          | 0.850 | 1.252 | 1.030                                           | 0.849 | 1.249 | 0.971                                          | 0.801 | 1.178 | 1.062                                           | 0.968 | 1.165 | 0.942                                          | 0.859 | 1.033 |
| <b>Age at asthma onset</b> | 1.011                                          | 0.970 | 1.054 | 0.989                                          | 0.948 | 1.031 | 1.020                                           | 0.980 | 1.063 | 0.980                                          | 0.941 | 1.021 | 1.009                                           | 0.991 | 1.027 | 0.991                                          | 0.974 | 1.009 |
| <b>FE phenotype</b>        | 3.835                                          | 0.662 | 22.22 | 0.261                                          | 0.045 | 1.512 | 3.385                                           | 0.622 | 18.43 | 0.295                                          | 0.054 | 1.609 | 0.883                                           | 0.354 | 2.199 | 1.133                                          | 0.455 | 2.822 |
|                            |                                                |       | 7     |                                                |       |       |                                                 |       |       |                                                |       | 2     |                                                 |       |       |                                                |       |       |



|                              |       |       |       |       |       |       |       |       |       |       |       |       |       |       |       |       |       |       |
|------------------------------|-------|-------|-------|-------|-------|-------|-------|-------|-------|-------|-------|-------|-------|-------|-------|-------|-------|-------|
| <b>Past smoker</b>           | 1.891 | 0.369 | 9.686 | 0.529 | 0.103 | 2.709 | 2.669 | 0.535 | 13.31 | 0.375 | 0.075 | 1.870 | 1.411 | 0.616 | 3.236 | 0.709 | 0.309 | 1.625 |
|                              | 8     |       |       |       |       |       |       |       |       |       |       |       |       |       |       |       |       |       |
| <b>Rhinitis</b>              | 2.976 | 0.497 | 17.79 | 0.336 | 0.056 | 2.010 | 2.707 | 0.469 | 15.62 | 0.369 | 0.064 | 2.132 | 0.910 | 0.428 | 1.933 | 1.099 | 0.517 | 2.336 |
|                              | 8     |       |       |       |       |       |       |       |       |       |       |       |       |       |       |       |       |       |
| <b>enphisema</b>             | 3.203 | 0.414 | 24.76 | 0.312 | 0.040 | 2.413 | 3.219 | 0.449 | 23.07 | 0.311 | 0.043 | 2.227 | 1.005 | 0.293 | 3.449 | 0.995 | 0.290 | 3.415 |
|                              | 2     |       |       |       |       |       |       |       |       |       |       |       |       |       |       |       |       |       |
| <b>OSAS</b>                  | 3.824 | 0.337 | 43.45 | 0.261 | 0.023 | 2.971 | 4.585 | 0.399 | 52.65 | 0,218 | 0,019 | 2,505 | 1,199 | 0.202 | 7.124 | 0.834 | 0.140 | 4.957 |
|                              | 6     |       |       |       |       |       |       |       |       |       |       |       |       |       |       |       |       |       |
| <b>GERD</b>                  | 1.486 | 0.287 | 7.695 | 0.673 | 0.130 | 3.487 | 1.443 | 0.285 | 7.294 | 0.693 | 0.137 | 3.504 | 0.971 | 0.423 | 2.232 | 1.030 | 0.448 | 2.367 |
| <b>Obesity</b>               | 2.388 | 0.287 | 19.88 | 0.419 | 0.050 | 3.486 | 1.893 | 0.235 | 15.28 | 0.528 | 0.065 | 4.262 | 0.793 | 0.258 | 2.433 | 1.261 | 0.411 | 3.870 |
|                              | 0     |       |       |       |       |       |       |       |       |       |       |       |       |       |       |       |       |       |
| <b>Arterial hypertension</b> | 0.903 | 0.171 | 4.776 | 1.108 | 0.209 | 5.862 | 1.010 | 0.195 | 5.233 | 0.991 | 0.191 | 5.134 | 1.118 | 0.519 | 2.412 | 0.894 | 0.415 | 1.928 |
| <b>Heart failure</b>         | 2.611 | 2.611 | 2.611 | 1.409 | 0.000 | -     | 1.017 | 1.017 | 1.017 | 0.984 | 0.000 | -     | 8.93  | 3.893 | 3.893 | 2.569 | 2.569 | 2.569 |
|                              | E-9   | E-9   | E-9   | E8    |       |       |       |       |       |       |       |       | E7    | E8    | E8    | E-9   | E-9   | E-9   |
| <b>Anxiety-depression</b>    | 4.225 | 4.225 | 4.225 | 8.706 | 2.975 | 2.548 | 1.588 | 1.588 | 1.588 | 2.317 | 2.317 | 2.317 | 3.758 | 1.284 | 10.99 | 0.266 | 0.091 | 0.779 |
|                              | E-9   | E-09  | E-09  | E7    | E7    | E8    | E-8   | E-08  | E-08  | E7    | E7    | E7    | *     |       | 5     | *     |       |       |
| <b>Poor control</b>          | 1.212 | 0.223 | 6.598 | 0.825 | 0.152 | 4.492 | 0.882 | 0.167 | 4.647 | 1.134 | 0.215 | 5.975 | 0.728 | 0.338 | 1.567 | 1.374 | 0.638 | 2.960 |

|                            |       |       |       |       |       |       |       |       |       |       |       |       |              |       |       |              |       |       |
|----------------------------|-------|-------|-------|-------|-------|-------|-------|-------|-------|-------|-------|-------|--------------|-------|-------|--------------|-------|-------|
| <b>FEV<sub>1</sub> (L)</b> | 0.826 | 0.185 | 3.683 | 1.210 | 0.272 | 5.393 | 0.924 | 0.212 | 4.034 | 1.082 | 0.248 | 4.725 | 1.118        | 0.606 | 2.063 | 0.894        | 0.485 | 1.650 |
| <b>FRC (%pred)</b>         | 1.027 | 0.994 | 1.062 | 0.974 | 0.942 | 1.006 | 1.006 | 0.975 | 1.039 | 0.994 | 0.962 | 1.026 | <b>0.980</b> | 0.965 | 0.995 | <b>1.020</b> | 1.005 | 1.036 |
|                            |       |       |       |       |       |       |       |       |       |       |       |       | *            |       |       | *            |       |       |
| <b>GINA</b>                | 0.818 | 0.379 | 1.764 | 1.223 | 0.567 | 2.640 | 0.794 | 0.371 | 1.697 | 1.260 | 0.589 | 2.694 | 0.971        | 0.689 | 1.368 | 1.030        | 0.731 | 1.452 |
| <b>Chronic OCS use</b>     | 3.945 | 0.262 | 59.44 | 0.253 | 0.017 | 3.819 | 2.045 | 0.157 | 26.66 | 0.489 | 0.038 | 6.376 | 0.518        | 0.117 | 2.303 | 1.929        | 0.434 | 8.573 |
|                            |       |       | 9     |       |       |       |       |       | 7     |       |       |       |              |       |       |              |       |       |
| <b>LAMA use</b>            | 0.588 | 0.075 | 4.629 | 1.700 | 0.216 | 13.38 | 1.729 | 0.229 | 13.03 | 0.578 | 0.077 | 4.360 | <b>2.940</b> | 1.072 | 8.060 | <b>0.340</b> | 0.124 | 0.933 |
|                            |       |       |       |       |       | 4     |       |       | 4     |       |       |       | *            |       |       | *            |       |       |
| <b>Nasal CS use</b>        | 0.499 | 0.107 | 2.321 | 2.003 | 0.431 | 9.310 | 0.504 | 0.112 | 2.258 | 1.986 | 0.443 | 8.902 | 1.009        | 0.495 | 2.054 | 0.991        | 0.487 | 2.019 |
| <b>antileukotrienes</b>    | 2.50  | 2.50  | 2.50  | 1.473 | 0.000 | -     | 3.82  | 3.82  | 3.82  | 9.636 | 0.000 | -     | 1.528        | 0.556 | 4.198 | 0.654        | 0.238 | 1.797 |
|                            | E-08  | E-08  | E-08  | E7    |       |       | E-08  | E-08  | E-08  | E6    |       |       |              |       |       |              |       |       |

\*=p<0.05, \*\*=p<0.01, \*\*\*=p<0.001. Bold font highlights statistically significant results. LB: lower bound, UB: upper bound. FE: frequent exacerbator ( $\geq 2$  exacerbation/year); OSAS: obstructive sleep apnoea syndrome; GERD: gastroesophageal reflux disease; FEV<sub>1</sub>: forced expiratory capacity in the first second; FRC: Functional residual capacity; GINA: Global Initiative for Asthma; LAMA: long-acting muscarinic antagonist; Obesity= BMI $\geq 30$ .
